# Supplementary material
Source: PubMed Central journal article supplement (PMC3535066)
Supplement: NIHMS428335-supplement-Supplementary_Table_2.pdf [file NIHMS428335-supplement-Supplementary_Table_2.pdf]

**Table S2. Tracking of individual cell fate with or without TPA treatment in 2-day time-lapse movies.**

|                  | Cell Number |       |
|------------------|-------------|-------|
|                  | - TPA       | + TPA |
| start tracking   | 40          | 64    |
| mitosis          | 66          | 3     |
| lost tracking    | 14          | 18    |
| alive on day 2   | 81          | 43    |
| dead on day 2    | 11          | 6     |
| death percentage | 13.6%       | 12.2% |
