# Supplementary material
Source: PubMed Central journal article supplement (PMC3535066)

- TPA

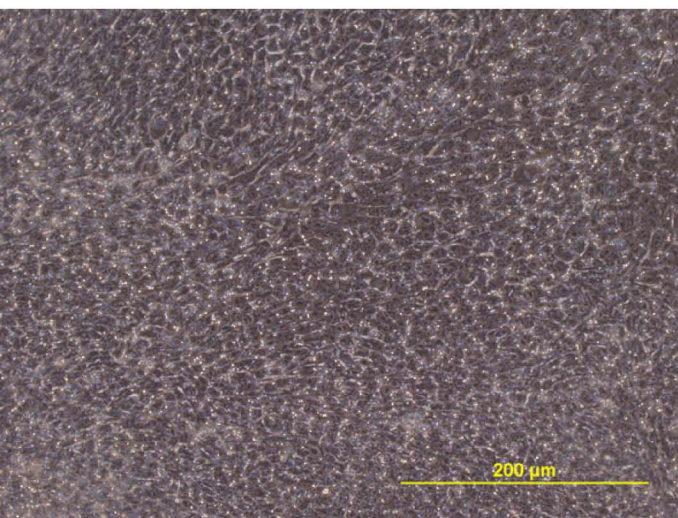

- TPA

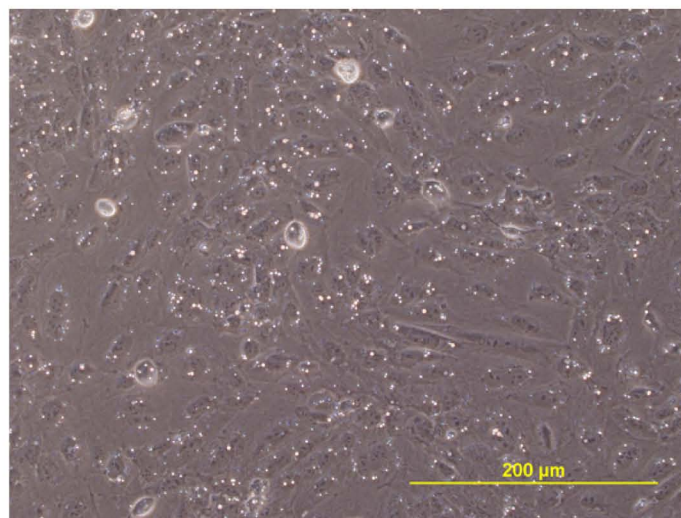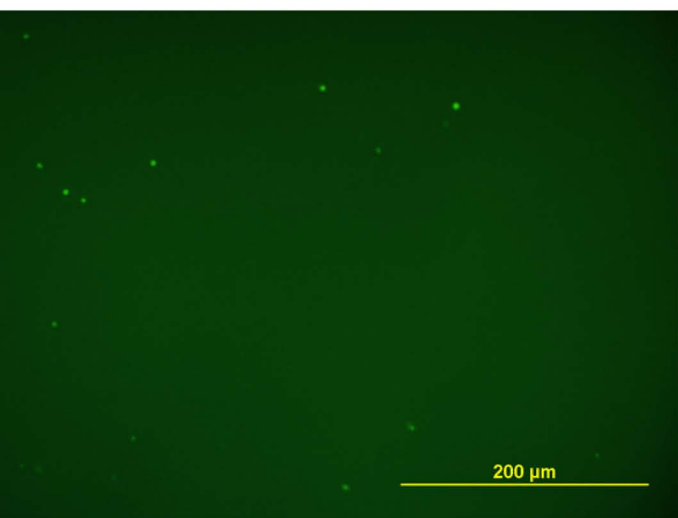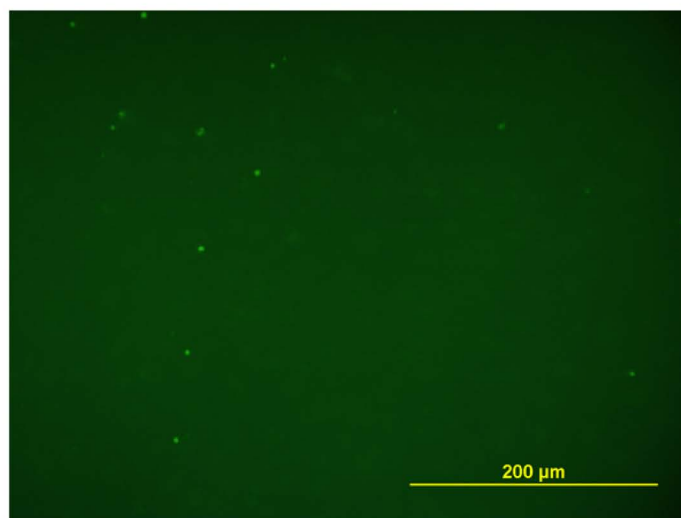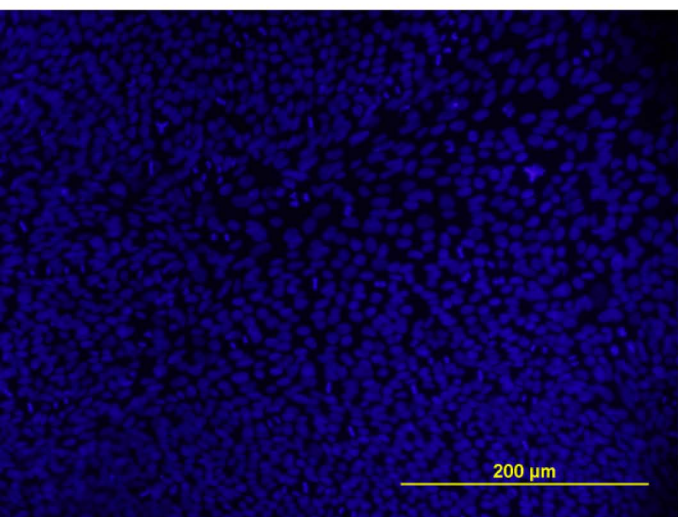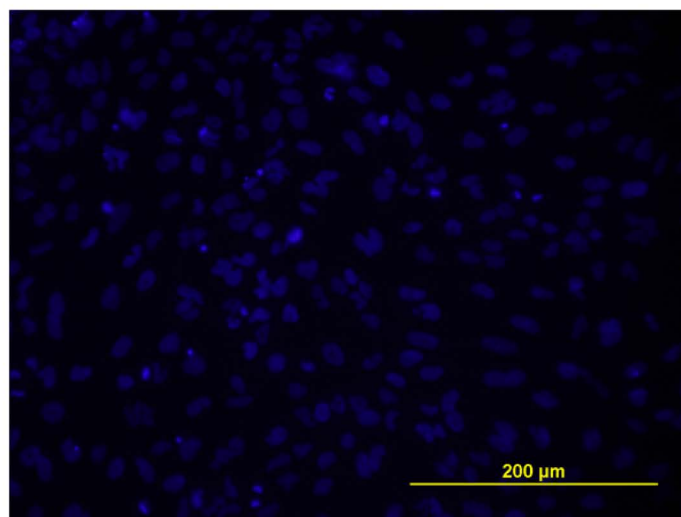

Supplement: NIHMS428335-supplement-Supplementary_Figure_1.pdf [file NIHMS428335-supplement-Supplementary_Figure_1.pdf]
